# Supplementary material
Source: PubMed Central journal article supplement (PMC11292484)
Supplement: NIHMS2010085-supplement-Supplemental_data.pdf [file NIHMS2010085-supplement-Supplemental_data.pdf]

## Supplemental Information

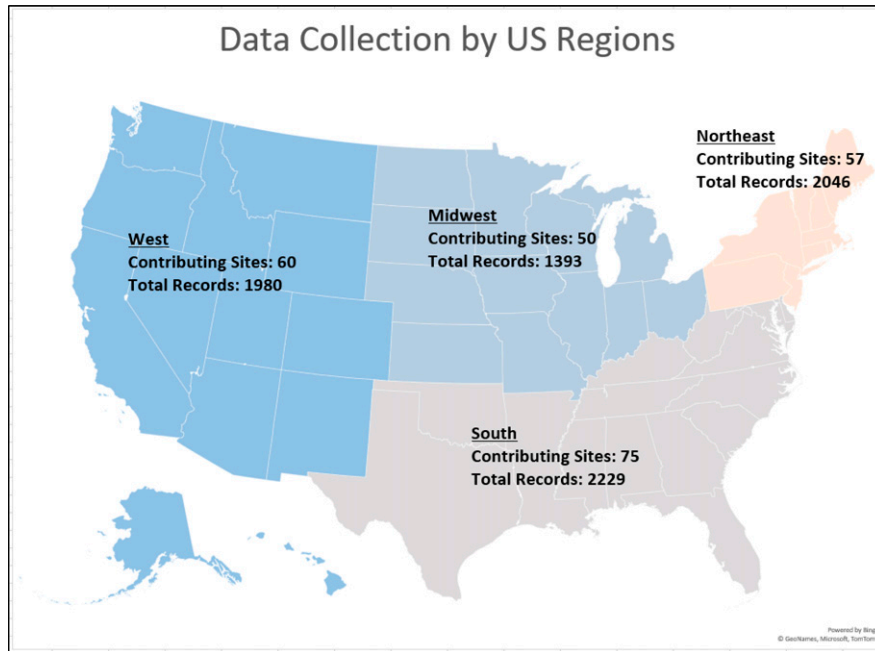

### **SUPPLEMENTAL FIGURE 3**

Distribution of Centers Contributing to the American Academy of Pediatrics Perinatal COVID-19 Registry ( $N = 242$ ), United States, April 6, 2020 to March 19, 2021, by United States Census Region.

**SUPPLEMENTAL TABLE 4** American Academy of Pediatrics Perinatal COVID-19 Registry, United States, April 6, 2020 to March 19, 2021 Participant Centers and Investigators

| Center                                                            | City          | State | Investigators                                                              |
|-------------------------------------------------------------------|---------------|-------|----------------------------------------------------------------------------|
| Arkansas Children's Hospital                                      | Little Rock   | AR    | Richard Whit Hall, Dalton Janssen                                          |
| St Bernard's Medical Center                                       | Jonesboro     | AR    | Enrique Gomez, Hailey McNew, Christal Steen, Evguenia Cole, Brenda Graff   |
| University of Arkansas for Medical Science Medical Center         | Little Rock   | AR    | Richard Whit Hall, Dalton Janssen                                          |
| Banner Desert Medical Center and Cardon Children's Medical Center | Mesa          | AZ    | Suma Rao, Christina Wade, Mark Baker, Becky Micetic                        |
| Banner University Medical Center Phoenix                          | Phoenix       | AZ    | Suganya Kathiravan, Christine Wade                                         |
| Children's Hospital of California                                 | Orange        | CA    | Michel Mikhael, Ofelia Vargas-Shiraishi, Juliann Rosales                   |
| Good Samaritan Hospital                                           | San Jose      | CA    | Pui Y. Lai, Rupal Patel, Loc Le, Tung-Ho Wang                              |
| Hoag Memorial Hospital Presbyterian                               | Newport Beach | CA    | Sophia Jones, Gazelle Bahramianfard                                        |
| John Muir Medical Center                                          | Walnut Creek  | CA    | Stacie Bennett                                                             |
| Kaiser Permanente Deer Valley                                     | Antioch       | CA    | Michael Kuzniewicz, Allen Fischer, Eileen Walsh, Suyi Zhu, Brigid Acuna    |
| Kaiser Permanente Fresno                                          | Fresno        | CA    | Michael Kuzniewicz, Allen Fischer, Eileen Walsh, Suyi Zhu, Brigid Acuna    |
| Kaiser Permanente Modesto Medical Center                          | Modesto       | CA    | Michael Kuzniewicz, Allen Fischer, Eileen Walsh, Suyi Zhu, Brigid Acuna    |
| Kaiser Permanente Oakland Medical Center                          | Oakland       | CA    | Michael Kuzniewicz, Allen Fischer, Eileen Walsh, Suyi Zhu, Brigid Acuna    |
| Kaiser Permanente Redwood City                                    | Redwood City  | CA    | Michael Kuzniewicz, Allen Fischer, Eileen Walsh, Suyi Zhu, Brigid Acuna    |
| Kaiser Permanente Roseville Medical Center                        | Roseville     | CA    | Michael Kuzniewicz, Allen Fischer, Eileen Walsh, Suyi Zhu, Brigid Acuna    |
| Kaiser Permanente San Francisco Medical Center                    | San Francisco | CA    | Michael Kuzniewicz, Allen Fischer, Eileen Walsh, Suyi Zhu, Brigid Acuna    |
| Kaiser Permanente San Jose Medical Center                         | San Jose      | CA    | Michael Kuzniewicz, Allen Fischer, Eileen Walsh, Suyi Zhu, Brigid Acuna    |
| Kaiser Permanente San Leandro Medical Center                      | San Leandro   | CA    | Michael Kuzniewicz, Allen Fischer, Eileen Walsh, Suyi Zhu, Brigid Acuna    |
| Kaiser Permanente Santa Clara Medical Center                      | Santa Clara   | CA    | Michael Kuzniewicz, Allen Fischer, Eileen Walsh, Suyi Zhu, Brigid Acuna    |
| Kaiser Permanente Santa Rosa Medical Center                       | Santa Rosa    | CA    | Michael Kuzniewicz, Allen Fischer, Eileen Walsh, Suyi Zhu, Brigid Acuna    |
| Kaiser Permanente South Sacramento Medical Center                 | Sacramento    | CA    | Michael Kuzniewicz, Allen Fischer, Eileen Walsh, Suyi Zhu, Brigid Acuna    |
| Kaiser Permanente Vacaville Medical Center                        | Vacaville     | CA    | Michael Kuzniewicz, Allen Fischer, Eileen Walsh, Suyi Zhu, Brigid Acuna    |
| Kaiser Permanente Vallejo Medical Center                          | Vallejo       | CA    | Michael Kuzniewicz, Allen Fischer, Eileen Walsh, Suyi Zhu, Brigid Acuna    |
| Kaiser Permanente Walnut Creek Medical Center                     | Walnut Creek  | CA    | Michael Kuzniewicz, Allen Fischer, Eileen Walsh, Suyi Zhu, Brigid Acuna    |
| LAC+USC Medical Center                                            | Los Angeles   | CA    | Molly Easterlin, Manoj Biniwale, Lorayne Barton                            |
| PIH Health Good Samaritan Hospital                                | Los Angeles   | CA    | Manoj Biniwale, Rangasamy Ramanathan                                       |
| PIH Health Whittier Hospital                                      | Whittier      | CA    | Liesbeth Maggiotto, Devang Patel, Fred Shum, Lisa Batistelli               |
| Pomona Valley Hospital Medical Center                             | Pomona        | CA    | Wang-Dar Sun, Hellen Rodriguez, Kenna Schnaar                              |
| Rady Children's Hospital                                          | San Diego     | CA    | Laurel Moyer, Sarah Lazar, Jordan Bui, Melanie Crabtree                    |
| Santa Clara Valley Medical Center                                 | San Jose      | CA    | Priya Jegatheesan, Angela Huang                                            |
| St Francis Medical Center                                         | Lynwood       | CA    | Kamakshi Devarajan, Valerie Colorado, Edna Mancao                          |
| St Joseph Hospital                                                | Orange        | CA    | Renuka Kar, Maria Ransil, Cynthia Morton                                   |
| St Jude Medical Center                                            | Fullerton     | CA    | Lavonne Sheng, Terry Zeilinger                                             |
| UC Irvine Medical Center                                          | Orange        | CA    | Cherry Uy, Pam Aron-Johnson                                                |
| UC San Diego Health                                               | San Diego     | CA    | Ericka Fernandez, Sarah Lazar, Jordan Bui, Melanie Crabtree, Sabrina Fossi |
| UCSF Benioff Children's Hospital Oakland                          | Oakland       | CA    | Arthur D'Harlingue                                                         |
| Denver Health and Hospital Authority                              | Denver        | CO    | Patricia Hagen, Rachel Pena                                                |
| Good Samaritan Medical Center                                     | Lafayette     | CO    | Michelle Feinberg, Laura Celvenger, Kelly Allen                            |
| Lutheran Medical Center                                           | Wheat Ridge   | CO    | Erica Wymore, Colleen Wheeler, Kelly Allen                                 |
| Platte Valley Medical Center                                      | Brighton      | CO    | Sadie Houin, Erin Jones, Kelly Allen                                       |
| Saint Joseph Hospital                                             | Denver        | CO    | Alfonso Pantoja, Corrie Alonzo, Allie Wildenstein, Kelly Allen             |

**SUPPLEMENTAL TABLE 4** Continued

| Center                                                | City              | State | Investigators                                                        |
|-------------------------------------------------------|-------------------|-------|----------------------------------------------------------------------|
| UC Health Greeley Hospital                            | Greeley           | CO    | Clyde Wright, Jessica Scott, Mary Pugh                               |
| UC Health Medical Center of the Rockies Trauma Center | Loveland          | CO    | Clyde Wright, Jessica Scott, Sue Townsend                            |
| UC Health Memorial Center                             | Colorado Springs  | CO    | Clyde Wright, Jessica Scott, Sue Townsend                            |
| UC Health Memorial Hospital North                     | Colorado Springs  | CO    | Clyde Wright, Jessica Scott, Lauren Beard                            |
| UCHealth Highlands Ranch Hospital                     | Highlands         | CO    | Clyde Wright, Jessica Scott, Wendy Barrett                           |
| UCHealth Poudre Valley Hospital                       | Fort Collins      | CO    | Clyde Wright, Jessica Scott, Jeanne Zenge                            |
| UCHealth Yampa Valley Medical Center                  | Steamboat Springs | CO    | Clyde Wright, Jessica Scott, Kathleen Hannan                         |
| University of Colorado Hospital                       | Aurora            | CO    | Clyde Wright, Jessica Scott, Kathleen Hannan                         |
| Bridgeport Hospital                                   | Bridgeport        | CT    | Catherine Buck, Christine Henry, Taryn Zamary                        |
| Connecticut Children's Medical Center                 | Hartford          | CT    | Annmarie Golioto, Nancy Cyr                                          |
| Greenwich Hospital                                    | Greenwich         | CT    | Catherine Buck, Christine Henry, Taryn Zamary                        |
| Hartford Hospital                                     | Hartford          | CT    | Sandra Motta, Jessie Mangs                                           |
| Hospital of Central Connecticut                       | New Britain       | CT    | Juliann Sheehan                                                      |
| Lawrence and Memorial Hospital                        | New London        | CT    | Catherine Buck, Christine Henry, Taryn Zamary                        |
| Middlesex Health                                      | Middletown        | CT    | Cliff O'Callahan, Laura Pittari                                      |
| Yale New Haven Hospital                               | New Haven         | CT    | Catherine Buck, Christine Henry, Taryn Zamary.                       |
| Children's National Hospital                          | Washington        | D.C.  | Lamia Soghier, Sofia Perazzo, Smitha Israel                          |
| George Washington University Hospital                 | Washington        | D.C.  | Ashley Sherwood                                                      |
| Medstar Georgetown University Hospital                | Washington        | D.C.  | Siva Subramanian, Tiffany Spriggs                                    |
| MedStar Washington Hospital Center                    | Washington        | D.C.  | Siva Subramanian, Tiffany Spriggs                                    |
| Wilmington Hospital – ChristianaCare                  | Wilmington        | DE    | Ursula Guillen, Amy Mackley                                          |
| Golisano Children's Hospital of Southwest FL          | Fort Myers        | FL    | William Liu                                                          |
| Holtz Children's at Jackson Memorial Hospital         | Miami             | FL    | Shahnaz Duara, Ana Cecilia Aguilar, Silvia Van Buskirk, Jan Mitchell |
| Mease Countryside Hospital                            | Safety Harbor     | FL    | Jenelle Ferry, Whitney Eldridge                                      |
| Morton Plant Hospital                                 | Clearwater        | FL    | Jenelle Ferry, Whitney Eldridge                                      |
| St Joseph's Hospital                                  | Tampa             | FL    | Jenelle Ferry, Whitney Eldridge                                      |
| St Joseph's Women's Hospital                          | Tampa             | FL    | Jenelle Ferry, Whitney Eldridge                                      |
| Tampa General Hospital – USF                          | Tampa             | FL    | Tara M. Randis, Marcia Kneusel                                       |
| UF Health Jacksonville                                | Jacksonville      | FL    | Josef Cortez, Ashley Maddox                                          |
| UF Health Shands Gainesville                          | Gainesville       | FL    | David Burchfield, Livia Sura                                         |
| Winnie Palmer Hospital for Women and Babies           | Orlando           | FL    | Rachel Prete, Cindy Tinder                                           |
| Wolfson Children's Hospital                           | Jacksonville      | FL    | Colby Day-Richardson, Ashley Maddox                                  |
| Emory Decatur Hospital                                | Decatur           | GA    | Michelle Pratt, Yvonne Loggins                                       |
| Emory Johns Creek Hospital                            | Johns Creek       | GA    | Lisa Martin, Yvonne Loggins                                          |
| Emory University Hospital Midtown                     | Atlanta           | GA    | Ravi Patel, Deepa Ranganathan, Yvonne Loggins, Colleen Mackie        |
| Grady Memorial Hospital                               | Atlanta           | GA    | Ravi Patel, Yvonne Loggins, Colleen Mackie                           |
| Northeast Georgia Medical Center                      | Gainesville       | GA    | Bridgette Schulman, Aubrey Williams                                  |
| Northside Hospital Atlanta                            | Atlanta           | GA    | Mike Hinkes, Katrina Grier, Janna Benston                            |
| St Joseph/Candler Hospital                            | Hinesville        | GA    | Joseph McLean, Meredith Scaccia                                      |
| Wellstar Spalding Regional Hospital                   | Griffin           | GA    | Jessica Daigle                                                       |
| Kapi'olani Medical Center for Women and Children      | Honolulu          | HI    | Sheree Kuo, Micah Tong                                               |
| Tripler Army Medical Center                           | Honolulu          | HI    | Alicia Prescott, Lauren Staiger, William Sherman                     |
| University of Iowa Stead Family Medical Center        | Iowa City         | IA    | Timothy Elgin, Karen Johnson                                         |
| St Luke's Health System                               | Boise             | ID    | Jennifer Merchant, Nichele Parks                                     |
| Ann and Robert Lurie Children's Hospital of Chicago   | Chicago           | IL    | Kerri Machut, Leena Mithal, Molly Schau                              |
| NorthShore University Health System                   | Evanston          | IL    | William Mackendrick, Sue Wolf                                        |
| Northwestern Medicine Center DuPage Hospital          | Winfield          | IL    | Rita Brennan                                                         |
| OSF Heart of Mary Medical Center                      | Urbana            | IL    | Gretchen Kopec, Michele Astle                                        |
| OSF Little Company of Mary Medical Center             | Evergreen Park    | IL    | Gretchen Kopec, Michele Astle                                        |
| OSF Sacred Heart Medical Center                       | Danville          | IL    | Gretchen Kopec, Michele Astle                                        |
| OSF St Anthony's Health Center                        | Rockford          | IL    | Gretchen Kopec, Michele Astle                                        |
| OSF St Elizabeth Medical Center Ottawa                | Ottawa            | IL    | Gretchen Kopec, Michele Astle                                        |
| OSF St Francis Medical Center                         | Peoria            | IL    | Gretchen Kopec, Michele Astle                                        |
| OSF St James – John W. Albrecht Medical Center        | Pontiac           | IL    | Gretchen Kopec, Michele Astle                                        |
| OSF St. Mary Medical Center                           | Galesburg         | IL    | Gretchen Kopec, Michele Astle                                        |
| Rush Copley Medical Center                            | Aurora            | IL    | Melissa Knapik                                                       |
| Rush University Medical Center                        | Chicago           | IL    | Andrew Berenz, Megan Gross                                           |
| Silver Cross Hospital                                 | New Lennox        | IL    | Colleen Malloy, Marilyn Paoletta                                     |

**SUPPLEMENTAL TABLE 4** Continued

| Center                                                       | City           | State | Investigators                                                                                         |
|--------------------------------------------------------------|----------------|-------|-------------------------------------------------------------------------------------------------------|
| University of Chicago                                        | Chicago        | IL    | Christine Carlos, Elena Yzchaki                                                                       |
| University of Illinois Hospital and Health Science System    | Chicago        | IL    | De-Ann Pillers, Zaynab Kadhem, Sara Cooper, Joann Romano-Keeler                                       |
| Southern Illinois University School of Medicine              | Springfield    | IL    | Beau Batton, Allison Spenner, Erin Bauer                                                              |
| IU Health Methodist Hospital                                 | Indianapolis   | IN    | Gregory Sokol, Leah Engelstad, Hannah Rakow                                                           |
| IU Health North Hospital                                     | Indianapolis   | IN    | Gregory Sokol, Leah Engelstad, Hannah Rakow                                                           |
| Peyton Manning Children's Hospital                           | Indianapolis   | IN    | Markus Tauscher, Zenaída Tauscher                                                                     |
| Sidney and Lois Eskenazi Hospital                            | Indianapolis   | IN    | Gregory Sokol, Leah Engelstad, Hannah Rakow                                                           |
| Overland Park Regional Medical Center                        | Overland       | KS    | Kathleen Weatherstone, Jessica Howlett                                                                |
| Norton Children's Hospital                                   | Louisville     | KY    | Tamina Singh, Stephanie Houston, Jennifer Nason Brittany Chumbley                                     |
| UK Kentucky Children's Hospital                              | Lexington      | KY    | John Bauer, Beth McKinney-Whitlock, Susan DeGraff                                                     |
| East Jefferson General Hospital                              | Metairie       | LA    | Jessica Patrick-Esteve, Peter Joslyn, Christy Mumphrey                                                |
| North Oaks Medical Center                                    | Hammond        | LA    | Jessica Patrick-Esteve, Peter Joslyn, Christy Mumphrey                                                |
| Slidell Memorial Hospital                                    | Slidell        | LA    | Jessica Patrick-Esteve, Peter Joslyn, Christy Mumphrey                                                |
| Touro Infirmary LCMC Health                                  | New Orleans    | LA    | Jessica Patrick-Esteve, Peter Joslyn, Christy Mumphrey                                                |
| Tulane Lakeside Hospital                                     | Metairie       | LA    | Elizabeth Lindsay, Michelle Steinhardt, Leslie Smitley, Monique Diles                                 |
| Woman's Hospital                                             | Baton Rouge    | LA    | Steven B. Spedale                                                                                     |
| Baystate Health                                              | Springfield    | MA    | Ruben Vaidya, Rachana Singh, Katie Wagner                                                             |
| Beth Israel Deaconess Medical Center                         | Boston         | MA    | John Zupancic, Neha Chaudhary                                                                         |
| Beverly Hospital                                             | Beverly        | MA    | Ivana Culic                                                                                           |
| Boston Children's Hospital                                   | Boston         | MA    | Amy O'Connell                                                                                         |
| Boston Medical Center                                        | Boston         | MA    | Margaret Parker, Vishakha Sabharwal, Lisa Tucker, Ruby Bartolome, Stephanie Houston, Maggie Brownrigg |
| Brigham and Women's Hospital                                 | Boston         | MA    | Mandy Belfort, Kaitlin Drouin, Tina Steele                                                            |
| Cambridge Health Alliance                                    | Cambridge      | MA    | Neha Chaudhary                                                                                        |
| Massachusetts General Hospital                               | Boston         | MA    | Jessica Shui                                                                                          |
| Newton-Wellesley Hospital                                    | Newton         | MA    | Silvia Patrizi                                                                                        |
| Tufts Medical Center                                         | Boston         | MA    | Jill L. Maron, Taysir Mahmoud                                                                         |
| U Mass Memorial Health Medical Center                        | Worcester      | MA    | Katherine Sullivan, Heather White, Archana Kalyanasundaram, Crystal Vasquez                           |
| Winchester Hospital                                          | Winchester     | MA    | Diana Yanni, Asimena Angelidou                                                                        |
| Holy Cross Hospital                                          | Silver Springs | MD    | Isabelle Von Kohorn, Karla Rondon                                                                     |
| Johns Hopkins University                                     | Baltimore      | MD    | Pamela Donohue, Jennifer Shepard                                                                      |
| MedStar Franklin Square Medical Center                       | Rossville      | MD    | Siva Subramanian, Tiffany Spriggs                                                                     |
| MedStar Harbor Hospital                                      | Baltimore      | MD    | Siva Subramanian, Tiffany Spriggs                                                                     |
| MedStar Montgomery Medical Center                            | Olney          | MD    | Siva Subramanian, Tiffany Spriggs                                                                     |
| MedStar Southern Maryland Hospital Center                    | Clinton        | MD    | Siva Subramanian, Tiffany Spriggs                                                                     |
| Walter Reed National Military Medical Center                 | Bethesda       | MD    | Kristen Smith                                                                                         |
| Maine Medical Center                                         | Portland       | ME    | Alan Picarillo                                                                                        |
| Helen DeVos Children's Hospital                              | Grand Rapids   | MI    | David Colombo, Emily Beltz, Kathy Nystrom                                                             |
| Henry Ford Hospital                                          | Detroit        | MI    | Sudhakar Ezhuthachan, Heather Abraam                                                                  |
| Hutzel Women's Hospital                                      | Detroit        | MI    | Sanket Jani, Monica Bajaj, Jorge Lua, Shanita Binyard                                                 |
| Sparrow Hospital                                             | Lansing        | MI    | Said Omar, Cheryl Abernathy, Sara Hackett                                                             |
| Trinity Health West Michigan d/b/a Mercy Health Saint Mary's | Grand Rapids   | MI    | Steven Gelfand, Stacy Smith                                                                           |
| University of Michigan Hospital                              | Ann Arbor      | MI    | Rebecca Vartanian, Diane White, Rachael Pace                                                          |
| Grand Itasca Clinic and Hospital                             | Grand Rapids   | MN    | Cheryl Gale, Amy Hanson, Martha Demeules, Emiliee Plautz, Jenna Wassenaar                             |
| M Health Fairview Lakes Medical Center                       | Wyoming        | MN    | Cheryl Gale, Amy Hanson, Martha Demeules, Emiliee Plautz, Jenna Wassenaar                             |
| M Health Fairview Northland Hospital                         | Princeton      | MN    | Cheryl Gale, Amy Hanson, Martha Demeules, Emiliee Plautz, Jenna Wassenaar                             |
| M Health Fairview Range Hospital                             | Hibbing        | MN    | Cheryl Gale, Amy Hanson, Martha Demeules, Emiliee Plautz, Jenna Wassenaar                             |
| M Health Fairview Ridges Hospital                            | Burnsville     | MN    | Cheryl Gale, Amy Hanson, Martha Demeules, Emiliee Plautz, Jenna Wassenaar                             |
| M Health Fairview Southdale Hospital                         | Edina          | MN    | Cheryl Gale, Amy Hanson, Martha Demeules, Emiliee Plautz, Jenna Wassenaar                             |

**SUPPLEMENTAL TABLE 4** Continued

| Center                                                                      | City              | State | Investigators                                                            |
|-----------------------------------------------------------------------------|-------------------|-------|--------------------------------------------------------------------------|
| M Health Fairview University of Minnesota Masonic Children's Hospital       | Minneapolis       | MN    | Cheryl Gale, Amy Hanson, Martha Demeules, Emilee Plautz, Jenna Wassenaar |
| Mayo Clinic                                                                 | Rochester         | MN    | Ellen Bendel-Stenzel, Kelly Haines                                       |
| Barnes Jewish Hospital                                                      | St. Louis         | MO    | Samuel Julian, Laura Linneman                                            |
| SSM Health DePaul Hospital                                                  | Bridgeton         | MO    | Justin Josephsen, Melissa Hawkins                                        |
| SSM Health St. Mary's Health                                                | St. Louis         | MO    | Justin Josephsen, Melissa Hawkins                                        |
| St Louis Children's Hospital                                                | St. Louis         | MO    | Samuel Julian, Laura Linneman                                            |
| University of Mississippi Medical Center                                    | Jackson           | MS    | Jagdish Desai, Heather Williams, Aurora Diaz, Nilesh Dankhara            |
| St Vincent Healthcare                                                       | Billings          | MT    | Alison Rentz                                                             |
| Atrium Health Levine Children's Hospital                                    | Charlotte         | NC    | Matthew Saxonhouse, Gail Harris                                          |
| Brenner Children's Hospital – Wake Forest Baptist Health                    | Winston-Salem     | NC    | Jeffrey S Shenberger, Cobi Ingram                                        |
| Duke University Health System                                               | Durham            | NC    | Kristin Weimer, Melissa Babilonia-Rosa, Mandy Marion                     |
| James and Connie Maynard Children's Hospital                                | Greenville        | NC    | Kelly Bear, Sherri Moseley                                               |
| Mission Hospital                                                            | Asheville         | NC    | Ansley Miller, Mary Cascio                                               |
| University of North Carolina Children's Hospital                            | Chapel Hill       | NC    | Genevieve Taylor, Jennifer Talbert, Cynthia Clark                        |
| WakeMed Health Raleigh Campus                                               | Raleigh           | NC    | Stephen Kicklighter, Donna White                                         |
| University of North Carolina Hospital – Newborn Nursery and Pediatric Floor | Chapel Hill       | NC    | Alison Sweeney, Athena Samaras                                           |
| UNMC/Nebraska Medicine                                                      | Omaha             | NE    | Ann Anderson-Berry, Betty Oberle, Kerry Petersen                         |
| Hackensack University Medical Center                                        | Hackensack        | NJ    | Nicole Spillane, Krsytyna Toczylowski                                    |
| Hackensack University Medical Center Mountainside                           | Hackensack        | NJ    | Jonathan Mintzer, Antoine Alexandra Lespinasse                           |
| Morristown Medical Center                                                   | Morristown        | NJ    | Caryn Peters                                                             |
| Newton Medical Center                                                       | Newton            | NJ    | Caryn Peters                                                             |
| Overlook Medical Center                                                     | Summit            | NJ    | Caryn Peters                                                             |
| Saint Barnabus Medical Center                                               | Livingston        | NJ    | Kwanchai Chan, Deborah Ann Ciaffi                                        |
| St Joseph's Medical Center                                                  | Patterson         | NJ    | Linda Skroce                                                             |
| University Hospital                                                         | Newark            | NJ    | Harpreet Kaur, Rani Thomas                                               |
| Virtua Lady of Lourdes                                                      | Camden            | NJ    | Sarvin Ghavam, Christine Catts, Jonathan Snyder                          |
| Virtua Memorial Hospital                                                    | Mount Holly       | NJ    | Sarvin Ghavam, Christine Catts, Jonathan Snyder                          |
| Virtua Voorhees Hospital                                                    | Voorhees Township | NJ    | Sarvin Ghavam, Christine Catts, Jonathan Snyder                          |
| University of New Mexico HSC                                                | Albuquerque       | NM    | Janelle Fuller, Sandra Beauman, Conra Backstrom Lacy                     |
| Albany Medical Center                                                       | Albany            | NY    | Debra Tristram, Philip Cook                                              |
| Catholic Health Good Samaritan Hospital                                     | West Islip        | NY    | Donna Celetano, Carol Rooney                                             |
| Columbia University Irving Medical Center                                   | New York          | NY    | Donna Garey, Tina Leone, Caitlin Ehret                                   |
| Jack D. Weiler Hospital                                                     | Bronx             | NY    | Thomas Havranaek, Magdy El-Hennawy                                       |
| John R. Oishei Children's Hospital                                          | Buffalo           | NY    | Praveen Chandrasekharan, Emily Li, Jennifer Donato                       |
| Maria Fareri Children's Hospital                                            | Valhalla          | NY    | Edmund La Gamma, Shetal Shah, Clare Giblin                               |
| Tisch Hospital                                                              | New York          | NY    | Michelle Vaz, Sourabh Verma, N. S. Freda Auyeung                         |
| United Health Services Hospitals, Inc.                                      | Johnson City      | NY    | Paula Farrell, Marybeth Culp, Terri Peters                               |
| UR Medicine – Strong Memorial Hospital                                      | Rochester         | NY    | Kristin Scheible, Mallory Prideaux, Rachel Jones, Tanya Scalise          |
| NYU Winthrop                                                                | Mineola           | NY    | Caterina Tiozzo                                                          |
| ProMedica Toledo Hospital                                                   | Toledo            | OH    | Howard Stein, Jessica Shoemaker                                          |
| St. Vincent's Mercy Medical Center                                          | Toledo            | OH    | Gagandeep Brar, Kelly Parker, Christine Calcamuggio                      |
| University Hospitals Cleveland Medical Center                               | Cleveland         | OH    | Michele C. Walsh, Anna Maria Hibbs, Nancy Newman, Riddhi Desai           |
| University of Cincinnati Medical Center                                     | Cincinnati        | OH    | Emily DeFranco, Lynea Bach, Allison Gurney-McMaster                      |
| Children's Hospital University of Oklahoma Health Science Center            | Oklahoma City     | OK    | Patricia Williams, Mike McCoy, Shannon Wilson                            |
| Comanche County Memorial Hospital                                           | Lawton            | OK    | Vadim Ivanov, Mike McCoy                                                 |
| Asante Rogue Regional Medical Center                                        | Medford           | OR    | Hilary Redden                                                            |
| Oregon Health and Science University                                        | Portland          | OR    | Dmitry Dukhovny, Monica Rincon, Milica Ivanovic                          |
| Women and Children's Services Providence Health System                      | Portland          | OR    | Joe Kaempf, Chiayi Chen, Nicole Tipping                                  |
| Randall Children's Hospital at Legacy Emanuel                               | Portland          | OR    | Howard Cohen, Kristin Hickey, Lori Keeth                                 |
| Salem Health                                                                | Salem             | OR    | Christopher Traudt                                                       |
| Children's Hospital of Philadelphia                                         | Philadelphia      | PA    | David Munson, Dustin Flannery, Madeline Pfeifer                          |
| Crozer Keystone Health Network                                              | Springfield       | PA    | Kathryn Kauffman                                                         |
| Einstein Medical Center Philadelphia                                        | Philadelphia      | PA    | Agnes Salvador, Gail Cameron                                             |
| Einstein Medical Center Montgomery                                          | East Norriton     | PA    | Sandeep Sadashiv                                                         |

**SUPPLEMENTAL TABLE 4** Continued

| Center                                                              | City             | State | Investigators                                                                           |
|---------------------------------------------------------------------|------------------|-------|-----------------------------------------------------------------------------------------|
| Geisinger Community Medical Center                                  | Scranton         | PA    | James A. Cook, Karena Moran                                                             |
| Geisinger Lewiston Hospital                                         | Lewiston         | PA    | James A. Cook, Karena Moran                                                             |
| Geisinger Medical Center                                            | Danville         | PA    | James A. Cook, Karena Moran                                                             |
| Geisinger Wyoming Valley Medical Center                             | Wilkes-Barre     | PA    | James A. Cook, Karena Moran                                                             |
| Holy Spirit Medical Center                                          | Camp Hill        | PA    | James A. Cook, Karena Moran                                                             |
| Hospital of the University of Pennsylvania                          | Philadelphia     | PA    | Elizabeth Foglia, Dustin Flannery, Madeline Pfeifer                                     |
| Pennsylvania Hospital                                               | Philadelphia     | PA    | Karen Puopolo, Dustin Flannery, Madeline Pfeifer                                        |
| Temple University Hospital                                          | Philadelphia     | PA    | Heidi Taylor, Sruthi Polavarapu                                                         |
| University of Pittsburgh Medical Center                             | Pittsburgh       | PA    | Toby Yanowitz, Victoria D'Orto                                                          |
| Valley Hospital Medical Center                                      | King of Prussia  | PA    | Christiana Farkouh-Karoleski, Peggy Bischoff                                            |
| Wellspring York Hospital                                            | York             | PA    | Elias Abebe, Michael Goodstein, Michelle Eppinger                                       |
| Medical University of South Carolina                                | Charleston       | SC    | Julie Ross, Ebony Dawkins Mikell                                                        |
| Spartanburg Medical Center                                          | Spartanburg      | SC    | Imelda Uy                                                                               |
| Avera McKennan Hospital and University Health Center                | Sioux Falls      | SD    | Maria Talavera-Barber, Christa Friedrich, Jessica Sundleaf                              |
| Monument Health                                                     | Rapid City       | SD    | Kim Balay, Nan Fitzgerald, Tara O'Leary                                                 |
| Sanford USD Medical Center                                          | Sioux Falls      | SD    | Michelle Baack, Megan Henning, Sarah Van Muyden                                         |
| Erlanger Health System                                              | Chattanooga      | TN    | Heather Gilliam                                                                         |
| Jackson-Madison County General Hospital                             | Jackson          | TN    | Josefina Go, Laura Richards                                                             |
| Regional One Women and Newborn Services                             | Memphis          | TN    | Vineet Lamba, Gail Camp                                                                 |
| University of Tennessee Medical Center Knoxville                    | Knoxville        | TN    | Courtney Gutman, Kristin Gipson                                                         |
| Vanderbilt University Medical Center                                | Nashville        | TN    | Joern-Hendrik Weitkamp, Theresa Rogers                                                  |
| Baptist Medical Center                                              | San Antonio      | TX    | Kaashif Ahmad, Melanie Drummond                                                         |
| Brooke Army Medical Center                                          | Fort Sam Houston | TX    | Rasheda Vereen, Caitlin Drumm                                                           |
| Children's Medical Center Dallas                                    | Dallas           | TX    | Luc Brion, Maria Caraig, Emilie Vanguyen                                                |
| Children's Memorial Hermann Hospital                                | Houston          | TX    | Michael Chang, Gabriela Del Bianco                                                      |
| CHRISTUS Santa Rosa Hospital – Westover Hills                       | San Antonio      | TX    | Kaashif Ahmad, Melanie Drummond                                                         |
| Methodist Hospital                                                  | San Antonio      | TX    | Kaashif Ahmad, Katy Kohlleppel                                                          |
| Methodist Hospital Stone Oak                                        | San Antonio      | TX    | Kaashif Ahmad, Katy Kohlleppel                                                          |
| Methodist Metropolitan                                              | San Antonio      | TX    | Kaashif Ahmad, Katy Kohlleppel                                                          |
| Northeast Baptist Hospital                                          | San Antonio      | TX    | Kaashif Ahmad, Melanie Drummond                                                         |
| Parkland Health and Hospital System                                 | Dallas           | TX    | Luc Brion, Maria Caraig, Erin Trout, Karina Frias-Esparza, Brooke Payton, Julide Sisman |
| St Luke's Baptist Hospital                                          | San Antonio      | TX    | Kaashif Ahmad, Melanie Drummond                                                         |
| The Children's Hospital of San Antonio                              | San Antonio      | TX    | Kaashif Ahmad, Melanie Drummond                                                         |
| University Hospital in San Antonio                                  | San Antonio      | TX    | Joseph B. Cantey, Diana Guerra                                                          |
| University of Utah Health                                           | Salt Lake City   | UT    | Mariana Baserga, Manndi Loertscher, Kelli Lund                                          |
| Children's Hospital of Richmond at Virginia Commonwealth University | Richmond         | VA    | Karen Hendricks-Muñoz, Russell Moores, Mark Astoria, Karen Fabian                       |
| University of Virginia Children's Hospital                          | Charlottesville  | VA    | Jonathan R. Swanson, Monika Thielen                                                     |
| Winchester Medical Center                                           | Winchester       | VA    | Edward I. Lee                                                                           |
| Valley Medical Center – UW Medical Center                           | Renton           | WA    | Christina Long, Toby Cohen                                                              |
| Unity Point Health – Meriter Hospital                               | Madison          | WI    | Elizabeth Goetz, Jamie Limjoco, Nina Menda                                              |
| Cabell Huntington Hospital                                          | Huntington       | WV    | Balaji Govindaswami, Jessica Haas                                                       |

**SUPPLEMENTAL TABLE 5** Registry Data Elements Recorded in the American Academy of Pediatrics Perinatal COVID-19 Registry, United States, April 6, 2020 to March 19, 2021

| Element                                                                                                   | Maternal                                                                                                                                                                                                                                                                                                                                                          | Recorded data |
|-----------------------------------------------------------------------------------------------------------|-------------------------------------------------------------------------------------------------------------------------------------------------------------------------------------------------------------------------------------------------------------------------------------------------------------------------------------------------------------------|---------------|
| Demographic information                                                                                   |                                                                                                                                                                                                                                                                                                                                                                   |               |
| Age at delivery hospitalization admission                                                                 | Number                                                                                                                                                                                                                                                                                                                                                            |               |
| Gravidity                                                                                                 | Number                                                                                                                                                                                                                                                                                                                                                            |               |
| Race                                                                                                      | Black or African American; white; Asian; American Indian or Alaska Native; Native Hawaiian or other Pacific Islander; other; unknown or not in medical record                                                                                                                                                                                                     |               |
| Ethnicity                                                                                                 | Hispanic; Non-Hispanic; unknown or not in medical record                                                                                                                                                                                                                                                                                                          |               |
| Labor and delivery                                                                                        |                                                                                                                                                                                                                                                                                                                                                                   |               |
| Labor                                                                                                     | Spontaneous; augmented; induced; no labor                                                                                                                                                                                                                                                                                                                         |               |
| Route of delivery                                                                                         | Vaginal; cesarean section                                                                                                                                                                                                                                                                                                                                         |               |
| If labor was augmented or induced or delivery was by c-section, list indications (choose all that apply): | Postdates; preeclampsia; arrest of descent; abruptio; chorioamnionitis; concern about worsening maternal condition because of COVID-19 infection; other (provide narrative)                                                                                                                                                                                       |               |
| Fetal indications for delivery                                                                            | Severe intrauterine growth restriction; fetal distress; hydrops fetalis; malpresentation; other (provide narrative)                                                                                                                                                                                                                                               |               |
| Rupture of membranes                                                                                      | Spontaneous; artificial                                                                                                                                                                                                                                                                                                                                           |               |
| Duration of rupture of membranes                                                                          | Number (hours)                                                                                                                                                                                                                                                                                                                                                    |               |
| Did mother receive betamethasone before delivery?                                                         | Yes or no                                                                                                                                                                                                                                                                                                                                                         |               |
| SARS-CoV-2 testing and illness                                                                            |                                                                                                                                                                                                                                                                                                                                                                   |               |
| COVID status at delivery                                                                                  | Confirmed COVID-19 or PUI (Person Under Investigation)                                                                                                                                                                                                                                                                                                            |               |
| Indication for which mother was tested (check all that apply)                                             | Policy to test all pregnant women admitted to labor and delivery; URI symptoms (cough, nasal congestion, sinus congestion, sore throat); LRI symptoms (respiratory distress, cough, wheezing); fever; GI symptoms (vomiting, diarrhea, nausea); myalgia and fatigue; anosmia or ageusia; contact with SARS-CoV-2 case; travel; unknown; other (provide narrative) |               |
| Maternal condition before admission for delivery                                                          | Asymptomatic; sick at home; required hospitalization for SARS-CoV-2 before delivery (anytime within 14 d before delivery); unknown (outborn)                                                                                                                                                                                                                      |               |
| If sick at home                                                                                           | URI symptoms (cough, nasal congestion, sinus congestion, sore throat); LRI symptoms (respiratory distress, cough, wheezing); fever; GI symptoms (vomiting, diarrhea, nausea); myalgia and fatigue; anosmia/ageusia; other (provide narrative)                                                                                                                     |               |
| If required hospitalization for SARS-CoV-2 before delivery                                                | IV fluids; supplemental O <sub>2</sub> ; CPAP; mechanical ventilation; ECMO; other (provide narrative)                                                                                                                                                                                                                                                            |               |
| Duration of illness before delivery                                                                       | Number (days)                                                                                                                                                                                                                                                                                                                                                     |               |
| Interval between date of admission for delivery and newborn date of birth (DOB)                           | Number (days)                                                                                                                                                                                                                                                                                                                                                     |               |
| Interval between date of first maternal symptoms of COVID-19 infection and newborn DOB                    | Number (days)                                                                                                                                                                                                                                                                                                                                                     |               |
| Interval between first positive maternal test and newborn DOB                                             | Number (days)                                                                                                                                                                                                                                                                                                                                                     |               |
| Interval between most recent maternal positive test and newborn DOB                                       | Number (days)                                                                                                                                                                                                                                                                                                                                                     |               |
| Did mother have negative SARS-CoV-2 testing after the positive test?                                      | Yes or no                                                                                                                                                                                                                                                                                                                                                         |               |
| If no, choose 1 of the following options                                                                  | No further testing was done after delivery; repeat testing after delivery remained positive                                                                                                                                                                                                                                                                       |               |
| Interval from delivery that mother was tested and negative                                                | Number (days) (if applicable)                                                                                                                                                                                                                                                                                                                                     |               |
| Maternal outcomes                                                                                         |                                                                                                                                                                                                                                                                                                                                                                   |               |
| Duration of maternal hospitalization                                                                      | Number (days)                                                                                                                                                                                                                                                                                                                                                     |               |
| Final maternal disposition                                                                                | Discharged; transferred; died                                                                                                                                                                                                                                                                                                                                     |               |
| Cause of maternal death (if applicable)                                                                   | Related to COVID; unrelated to COVID; unknown                                                                                                                                                                                                                                                                                                                     |               |
| Did mother receive specific treatment of SARS-CoV-2? if yes, list therapy                                 | Yes or no<br>Chloroquine; Hydroxychloroquine; Remdesivir; Ritonavir; Favipiravir; Lopinavir; other (provide narrative)                                                                                                                                                                                                                                            |               |

SUPPLEMENTAL TABLE 5 Continued

| Element                                                                                                                                        | Maternal                                                                                                                                                                                                                                                                                                                                                   | Recorded data |
|------------------------------------------------------------------------------------------------------------------------------------------------|------------------------------------------------------------------------------------------------------------------------------------------------------------------------------------------------------------------------------------------------------------------------------------------------------------------------------------------------------------|---------------|
| Newborn                                                                                                                                        |                                                                                                                                                                                                                                                                                                                                                            |               |
| Demographic                                                                                                                                    |                                                                                                                                                                                                                                                                                                                                                            |               |
| Gestational age at birth                                                                                                                       | Number (nearest completed week)                                                                                                                                                                                                                                                                                                                            |               |
| Birth wt                                                                                                                                       | Number (grams)                                                                                                                                                                                                                                                                                                                                             |               |
| Sex                                                                                                                                            | Female; male; other                                                                                                                                                                                                                                                                                                                                        |               |
| Apgar at 5 min                                                                                                                                 | Number (0–10)                                                                                                                                                                                                                                                                                                                                              |               |
| Birth multiplicity                                                                                                                             | Single; twin A; twin B; higher order (triplet, etc.)                                                                                                                                                                                                                                                                                                       |               |
| Status at birth                                                                                                                                | Liveborn; stillborn; death in delivery room                                                                                                                                                                                                                                                                                                                |               |
| Delivery room and postnatal condition and care                                                                                                 |                                                                                                                                                                                                                                                                                                                                                            |               |
| Resuscitation at birth (check all that apply):                                                                                                 | Drying and stimulation only; supplemental oxygen; positive pressure (CPAP or mask ventilation); intubation; chest compressions; epinephrine; vol expansion                                                                                                                                                                                                 |               |
| Neonatal signs during hospitalization (choose all that apply)                                                                                  | None; fever (>37.8 C); cough; vomiting or diarrhea; respiratory distress; hypotonia; other diagnosis (provide narrative)                                                                                                                                                                                                                                   |               |
| Respiratory distress diagnosis (if applicable)                                                                                                 | Provide narrative                                                                                                                                                                                                                                                                                                                                          |               |
| Maximum level of respiratory support during hospitalization                                                                                    | None; supplemental oxygen; CPAP; mechanical ventilation; ECMO                                                                                                                                                                                                                                                                                              |               |
| Other diagnoses (choose all that apply):                                                                                                       | None; delayed transition; surfactant deficiency; pulmonary hypertension; hypotension; hypoglycemia; hypothermia; culture-confirmed bacterial sepsis (organism, provide narrative); microcephaly; encephalopathy; congenital anomalies (provide narrative); other (provide narrative)                                                                       |               |
| Other administered neonatal intensive care (choose all that apply):                                                                            | None; antibiotics; antiviral agents (provide narrative); intravenous fluids; inhaled nitric oxide or prostacyclin; pressors; surfactant; hydrocortisone; dexamethasone; therapeutic hypothermia; ECMO; other                                                                                                                                               |               |
| Pressors                                                                                                                                       | Dopamine; dobutamine epinephrine                                                                                                                                                                                                                                                                                                                           |               |
| Other intensive care administered                                                                                                              | Provide narrative                                                                                                                                                                                                                                                                                                                                          |               |
| Did mother provide breast milk (choose all that apply):                                                                                        | Direct nursing by mother; expressed maternal milk fed by mother; expressed maternal milk fed by another caregiver; donor milk; no; unknown                                                                                                                                                                                                                 |               |
| If infant received mother's own milk, either by direct breast feeding or by expression, what was the testing status of the mother at that time | Positive; pending; negative; not tested; unknown                                                                                                                                                                                                                                                                                                           |               |
| Primary reason for neonatal transfer to your hospital (select NA if child was inborn)                                                          | Clinical illness presumed related to COVID-19 infection; other clinical illness not presumed related to COVID-19 infection; no clinical illness; transport because of maternal COVID-19 diagnosis; NA                                                                                                                                                      |               |
| Newborn outcomes                                                                                                                               |                                                                                                                                                                                                                                                                                                                                                            |               |
| Duration of neonatal hospitalization at your hospital                                                                                          | Number (days)                                                                                                                                                                                                                                                                                                                                              |               |
| Final newborn disposition                                                                                                                      | Discharge home; transferred to other facility; died before discharge (provide narrative cause)                                                                                                                                                                                                                                                             |               |
| Cause of newborn death                                                                                                                         | Related to COVID-19; not related to COVID-19; unknown                                                                                                                                                                                                                                                                                                      |               |
| Discharge medications                                                                                                                          | None; if given, provide narrative                                                                                                                                                                                                                                                                                                                          |               |
| Newborn isolation                                                                                                                              |                                                                                                                                                                                                                                                                                                                                                            |               |
| Was newborn admitted to a higher level of care (eg, NICU) than a newborn nursery or general hospital ward (for boarding care)?                 | Yes or no                                                                                                                                                                                                                                                                                                                                                  |               |
| If inborn: were mother and infant separated at your hospital at birth?                                                                         | Yes, no, or unknown                                                                                                                                                                                                                                                                                                                                        |               |
| If outborn: was mother not given visitation rights until she was virologically cleared?                                                        | Yes, no, or unknown                                                                                                                                                                                                                                                                                                                                        |               |
| Was the infant isolated in your hospital (choose all that apply)?                                                                              | Contact and droplet precautions only (gown, gloves, surgical mask and face or eye shield); contact, droplet, and airborne precautions (gown, gloves, N95 mask and face or eye shield); contact, droplet, and airborne precautions (gown, gloves, N95 mask and face or eye shield) and negative pressure room; yes - other (provide narrative); no; unknown |               |



**SUPPLEMENTAL TABLE 5** Continued

| Element                                                                                                                                                                                                                                                                                                 | Maternal                                                                                                                                                                                                                                                                                                                                                                                                                                                                                                                                                                          | Recorded data |
|---------------------------------------------------------------------------------------------------------------------------------------------------------------------------------------------------------------------------------------------------------------------------------------------------------|-----------------------------------------------------------------------------------------------------------------------------------------------------------------------------------------------------------------------------------------------------------------------------------------------------------------------------------------------------------------------------------------------------------------------------------------------------------------------------------------------------------------------------------------------------------------------------------|---------------|
| <p>What were the locations at which the infant was cared for at your hospital (choose all that apply):</p> <p>Newborn laboratory testing</p> <p>Did newborn have SARS-CoV-2 testing at days 0–14 after birth?</p> <p>SARS-CoV-2 test results (data entry fields provided for days 0–14 after birth)</p> | <p>NICU; nursery room separate from mother; room-in with mother; negative pressure isolation room; regular isolation room; other (provide narrative)</p> <p>Yes or no</p> <p>Indicate day of test; and site of specimen nasopharyngeal, throat or rectal site; if done, amniotic fluid; placenta; gastric aspirate and breastmilk testing results (all results recorded as positive or negative)</p> <p>Lowest white count; lowest neutrophil count; lowest lymphocyte count; lowest hemoglobin; highest AST; highest ALT; highest CRP (provide value and day value obtained)</p> |               |
| <p>Laboratory data from days 0–7 after birth</p>                                                                                                                                                                                                                                                        |                                                                                                                                                                                                                                                                                                                                                                                                                                                                                                                                                                                   |               |

ALT, alanine transaminase; AST, aspartate transaminase; CPAP, continuous positive airway pressure; CRP, C-reactive protein; IRI, lower respiratory infection; NA, not applicable; URI, upper respiratory infection.

**SUPPLEMENTAL TABLE 6** Maternal Characteristics Associated With Newborn Testing Status in the American Academy of Pediatrics Perinatal COVID-19 Registry, United States, April 6, 2020 to March 19, 2021

|                                                          | All ( <i>n</i> = 7524) | Newborn Not Tested ( <i>n</i> = 1149) | Newborn Tested ( <i>n</i> = 6375) | <i>P</i> |
|----------------------------------------------------------|------------------------|---------------------------------------|-----------------------------------|----------|
| Age, y, median (IQR)                                     | 28 (24–33)             | 29 (24–33)                            | 28 (24–33)                        | .348     |
| Gravidity, <i>n</i> , median (IQR)                       | 2 (1–4)                | 2 (1–4)                               | 2 (1–4)                           | .217     |
| Maternal race and ethnicity, <i>n</i> (%)                |                        |                                       |                                   | <.001    |
| Hispanic                                                 | 3337 (44.4)            | 372 (32.4)                            | 2965 (46.5)                       |          |
| non-Hispanic Black                                       | 1457 (19.4)            | 191 (16.6)                            | 1266 (19.9)                       |          |
| non-Hispanic white                                       | 1846 (24.5)            | 442 (38.5)                            | 1404 (22.0)                       |          |
| Asian                                                    | 290 (3.9)              | 52 (4.5)                              | 238 (3.7)                         |          |
| American Indian or Alaska Native                         | 63 (0.8)               | 12 (1.0)                              | 51 (0.8)                          |          |
| Native Hawaiian or other Pacific Islander                | 62 (0.8)               | 13 (1.1)                              | 49 (0.8)                          |          |
| Other or unknown <sup>a</sup>                            | 469 (6.2)              | 67 (5.8)                              | 402 (6.3)                         |          |
| Multiple gestation, <i>n</i> (%)                         | 145 (1.9)              | 12 (1.0)                              | 133 (2.1)                         | .018     |
| Betamethasone before delivery, <i>n</i> (%) <sup>b</sup> | 571/7381 (7.7)         | 50/1129 (4.4)                         | 521/6252 (8.3)                    | <.001    |
| Delivery mode, <i>n</i> (%)                              |                        |                                       |                                   | <.001    |
| Vaginal                                                  | 4889 (65.0)            | 831 (72.3)                            | 4058 (63.7)                       |          |
| Cesarean                                                 | 2604 (34.6)            | 314 (27.3)                            | 2290 (35.9)                       |          |
| Unknown                                                  | 31 (0.4)               | 4 (0.3)                               | 27 (0.4)                          |          |
| Maternal COVID-19 status at admission, <i>n</i> (%)      |                        |                                       |                                   | .003     |
| Asymptomatic                                             | 5875 (78.1)            | 927 (80.7)                            | 4948 (77.6)                       |          |
| Symptomatic                                              | 1369 (18.2)            | 195 (17.0)                            | 1174 (18.4)                       |          |
| Admitted for COVID care ≤14 d before delivery            | 254 (3.4)              | 21 (1.8)                              | 233 (3.7)                         |          |
| Unknown                                                  | 26 (0.3)               | 6 (0.5)                               | 20 (0.3)                          |          |
| Maternal status at discharge, <i>n</i> (%)               |                        |                                       |                                   | .067     |
| Discharged from the hospital                             | 7483 (99.5)            | 1148 (99.9)                           | 6335 (99.4)                       |          |
| Transferred                                              | 21 (0.3)               | 0 (0)                                 | 21 (0.3)                          |          |
| Died                                                     | 18 (0.2)               | 1 (0.1)                               | 17 (0.3)                          |          |
| Unknown                                                  | 2 (0.0)                | 0 (0)                                 | 2 (0.0)                           |          |

IQR, interquartile range (25th and 75th percentiles).

<sup>a</sup> Other or unknown category includes 171 persons with other race or ethnicity; 250 persons with unknown ethnicity; 48 persons with non-Hispanic ethnicity and unknown race.

<sup>b</sup> Data missing for 143 subjects.

**SUPPLEMENTAL TABLE 7** Newborn Characteristics Associated with Newborn Testing Status in the American Academy of Pediatrics Perinatal COVID-19 Registry, United States, April 6, 2020 to March 19, 2021

|                                                         | All (n = 7648)   | Newborn Not Tested (n = 1162) | Newborn Tested (n = 6486) | P     |
|---------------------------------------------------------|------------------|-------------------------------|---------------------------|-------|
| Birth wt, g, median (IQR)                               | 3210 (2830–3540) | 3274 (2930–3600)              | 3200 (2820–3530)          | <.001 |
| Sex, n (%)                                              |                  |                               |                           | .018  |
| Female                                                  | 3678 (48.1)      | 597 (51.4)                    | 3081 (47.5)               |       |
| Male                                                    | 3966 (51.9)      | 565 (48.6)                    | 3401 (52.4)               |       |
| Unreported                                              | 4 (0.1)          | 0 (0)                         | 4 (0.1)                   |       |
| Multiple gestation infants, n (%)                       | 269 (3.5)        | 25 (2.2)                      | 244 (3.8)                 | .050  |
| Small for gestational age, n (%) <sup>a</sup>           | 747/7630 (9.8)   | 101/1149 (8.8)                | 646/6481 (10.0)           | .225  |
| Infants born ≥37 wk' gestation                          | 6458 (84.4)      | 1041 (89.6)                   | 5417 (83.5)               |       |
| NICU admission, n (%) <sup>b</sup>                      | 901/6392 (14.1)  | 46/1028 (4.5)                 | 855/5364 (15.9)           | <.001 |
| Mechanical ventilation, n (%) <sup>c</sup>              | 63/6394 (1.0)    | 5/1035 (0.5)                  | 58/5359 (1.1)             | .083  |
| Infants born <37 wk' gestation                          | 1190 (15.6)      | 121 (10.4)                    | 1069 (16.5)               |       |
| NICU admission, n (%) <sup>d</sup>                      | 699/1177 (59.4)  | 40/120 (33.3)                 | 659/1057 (62.3)           | <.001 |
| Mechanical ventilation, n (%) <sup>e</sup>              | 184/1182 (15.6)  | 11/120 (9.2)                  | 173/1062 (16.3)           | .030  |
| Maternal-infant separation at birth, n (%) <sup>f</sup> | 2414/7610 (31.7) | 112/1150 (9.7)                | 2302/6460 (35.6)          | <.001 |
| Any breast milk feeding, n (%)                          | 5401 (70.6)      | 944 (81.2)                    | 4457 (68.7)               | <.001 |
| Infant disposition, n (%)                               |                  |                               |                           | .003  |
| Discharge home                                          | 7541 (98.6)      | 1134 (97.6)                   | 6407 (98.8)               |       |
| Transferred                                             | 78 (1.0)         | 16 (1.4)                      | 62 (1.0)                  |       |
| Died                                                    | 29 (0.4)         | 12 (1.0)                      | 17 (0.3)                  |       |

Table includes all live births that survived beyond delivery room, and with available postnatal testing data. IQR, interquartile range (25th and 75th percentiles.)

<sup>a</sup> Data missing for 18 infants.

<sup>b</sup> Data missing for 66 infants.

<sup>c</sup> Data missing for 64 infants. ECMO support provided to 2 infants.

<sup>d</sup> Data missing for 13 infants.

<sup>e</sup> Data missing for 8 infants. No infants born <37 wk' gestation were treated with ECMO.

<sup>f</sup> Data missing for 38 infants.

**SUPPLEMENTAL TABLE 8** Relationship Between Maternal COVID Illness, Timing of Maternal SARS-CoV-2 Testing and Newborn SARS-CoV-2 Test Results, American Academy of Pediatrics Perinatal COVID-19 Registry, United States, April 6, 2020 to March 19, 2021

| Duration Between First Positive Maternal Test and Delivery             | ≥1 Newborn Resulting From the Pregnancy was Tested for SARS-CoV-2 ( <i>n</i> = 6375) <sup>a</sup> | ≥1 Newborn PCR Positive ( <i>n</i> = 139) <sup>a</sup> | All Newborns PCR Negative ( <i>n</i> = 6236) <sup>a</sup> |
|------------------------------------------------------------------------|---------------------------------------------------------------------------------------------------|--------------------------------------------------------|-----------------------------------------------------------|
| All pregnant persons ( <i>n</i> = 6375)                                |                                                                                                   |                                                        |                                                           |
| 14 to 4 d, <i>n</i> (% PCR +)                                          | 1211                                                                                              | 26 (2.1)                                               | 1185 (97.9)                                               |
| 3 to 0 d, <i>n</i> (% PCR +)                                           | 5011                                                                                              | 95 (1.9)                                               | 4916 (98.1)                                               |
| -1 to -10 d, <i>n</i> (% PCR +)                                        | 153                                                                                               | 18 (11.8)                                              | 135 (88.2)                                                |
| Total                                                                  | 6375                                                                                              | 139 (2.2)                                              | 6236 (97.8)                                               |
| Asymptomatic at time of delivery ( <i>n</i> = 4948)                    |                                                                                                   |                                                        |                                                           |
| 14 to 4 d, <i>n</i> (% PCR +)                                          | 577                                                                                               | 7 (1.2)                                                | 570 (98.8)                                                |
| 3 to 0 d, <i>n</i> (% PCR +)                                           | 4246                                                                                              | 67 (1.6)                                               | 4179 (98.4)                                               |
| -1 to -10 d, <i>n</i> (% PCR +)                                        | 125                                                                                               | 17 (13.6)                                              | 108 (86.4)                                                |
| Total                                                                  | 4948                                                                                              | 91 (1.8)                                               | 4857 (98.2)                                               |
| Symptomatic at time of delivery ( <i>n</i> = 1174)                     |                                                                                                   |                                                        |                                                           |
| 14 to 4 d, <i>n</i> (% PCR +)                                          | 472                                                                                               | 14 (3.0)                                               | 458 (97.0)                                                |
| 3 to 0 d, <i>n</i> (% PCR +)                                           | 676                                                                                               | 26 (3.8)                                               | 650 (96.2)                                                |
| -1 to -10 d, <i>n</i> (% PCR +)                                        | 26                                                                                                | 1 (3.8)                                                | 25 (96.2)                                                 |
| Total                                                                  | 1174                                                                                              | 41 (3.5)                                               | 1133 (96.5)                                               |
| Hospitalized for COVID-19 care ≤14 d before delivery ( <i>n</i> = 233) |                                                                                                   |                                                        |                                                           |
| 14 to 4 d, <i>n</i> (% PCR +)                                          | 156                                                                                               | 4 (2.6)                                                | 152 (97.4)                                                |
| 3 to 0 d, <i>n</i> (% PCR +)                                           | 76                                                                                                | 1 (1.3)                                                | 75 (98.7)                                                 |
| -1 to -10 d, <i>n</i> (% PCR +)                                        | 1                                                                                                 | 0 (0)                                                  | 1 (100.0)                                                 |
| Total                                                                  | 233                                                                                               | 5 (2.1)                                                | 228 (97.9)                                                |

Table includes all newborns who survived beyond delivery room and who had postnatal testing data. In 21 instances, SARS-CoV-2 illness status for the pregnant person on admission was unknown or was not reported. Comparison of the proportion of persons with newborns testing PCR positive across the 3 time frames was significant ( $P < .001$ ) for all pregnant persons and for those asymptomatic at the time of delivery. This comparison was not significant for symptomatic or hospitalized for COVID-19 pregnant persons.

<sup>a</sup>*N* refers to number of pregnant persons.
